# Supplementary material
Source: MDPI journal article supplement (https://www.mdpi.com/2413-4155/5/1/2)
Supplement: s1 [file s1 › sci-2083333-supplementary.pdf]

# **Supplementary Materilas**

## **Yield and composition variations of the milk from different camel breeds in Saudi Arabia**

**Amr A. El-Hanafy <sup>1,2</sup>, Yasser M. Saad <sup>1,3</sup>, Saleh A. Alkarim <sup>1</sup>, Hussein A. Almehdar <sup>1</sup>, Fuad M. Alzahrani <sup>1</sup>, Mo-hammed A. Almatry <sup>1</sup>, Vladimir N. Uversky <sup>1,4,5,\*</sup>, and Elrashdy M. Redwan <sup>1,6,\*</sup>**

<sup>1</sup> Biological Sciences Department, Faculty of Sciences, King Abdulaziz University, P. O. Box 80203, Jeddah, 21589, Saudi Arabia

<sup>2</sup> Nucleic Acids Research Department, Genetic Engineering and Biotechnology Research Institute (GEBRI), City of Scientific Research and Technological Applications, Alexandria, Egypt, Borg El Arab, P. O. box. 21934.

<sup>3</sup> Genetics Laboratory, National Institute of Oceanography and Fisheries, Egypt;

<sup>4</sup> Institute for Biological Instrumentation of the Russian Academy of Sciences, Pushchino, Moscow region 142290, Russia

<sup>5</sup> Department of Molecular Medicine and USF Health Byrd Alzheimer's Research Institute, Morsani College of Medicine, University of South Florida, Tampa, FL, USA

<sup>6</sup> Therapeutic and Protective Proteins Laboratory, Protein Research Department, Genetic Engineering and Biotechnology Research Institute, City for Scientific Research and Technology Applications, New Borg EL-Arab 21934, Alexandria, Egypt

\* Correspondence: lradowan@kau.edu.sa (E.M.R); vuversky@usf.edu (V.N.U.)

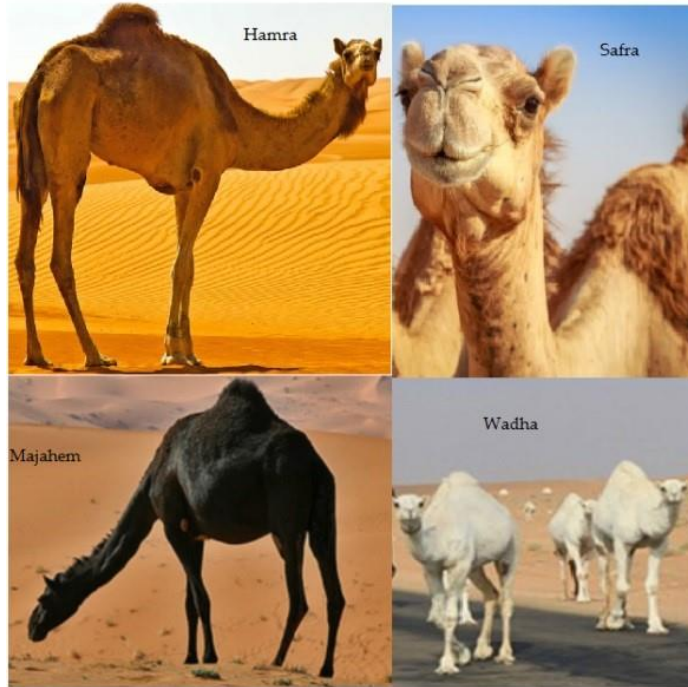

**Figure S1:** Ecotype of Saudi camel clans (Hamra, Safra, Majaheim and Wadha), milk of which was analyzed in this study.
